# Supplementary material
Source: publisher site journal article supplement (https://www.dovepress.com/article/420059)
Supplement: Supplementary file 1 [file get_supplementary_file.php]

**Supplementary Table 1.** Search strategies

| <b>Database<br/>(Search time)</b>                            | <b>Search</b> | <b>Search String</b>                                                                                                                                                                                                                                                                                                                                                                      |
|--------------------------------------------------------------|---------------|-------------------------------------------------------------------------------------------------------------------------------------------------------------------------------------------------------------------------------------------------------------------------------------------------------------------------------------------------------------------------------------------|
| <b>PubMed and<br/>MEDLINE<br/>[November 21,<br/>2022]</b>    | 1             | (Ischemic Stroke* OR Ischaemic Stroke* OR CryptogenicIschemic Stroke* OR Cryptogenic Stroke* OR Cryptogenic Embolism Stroke* OR Wake up Stroke* OR AcuteIschemic Stroke* OR Embolic Stroke* OR Cardioembolic Stroke* OR Cardio-embolic Stroke* OR Thrombotic Stroke* OR Acute Thrombotic Stroke* OR Lacunar Stroke* OR Lacunar Syndrome* OR Lacunar Infarction* OR Lacunar Infarct*)      |
|                                                              | 2             | (Medication Adherence OR Medication Nonadherence OR Medication Noncompliance OR Medication Persistence OR Medication Compliance OR Medication Non-Compliance) OR AB=(Medication Adherence OR Medication Nonadherence OR Medication Noncompliance OR Medication Persistence OR Medication Compliance OR Medication Non-Compliance)                                                         |
|                                                              | 3             | (Barrier*)                                                                                                                                                                                                                                                                                                                                                                                |
|                                                              | 4             | 1 AND 2 AND 3                                                                                                                                                                                                                                                                                                                                                                             |
| <b>Web of Science<br/>[November 21,<br/>2022]</b>            | 1             | (TI=(Ischemic Stroke* OR Ischaemic Stroke* OR CryptogenicIschemic Stroke* OR Cryptogenic Stroke* OR Cryptogenic Embolism Stroke* OR Wake up Stroke* OR AcuteIschemic Stroke* OR Embolic Stroke* OR Cardioembolic Stroke* OR Cardio-embolic Stroke* OR Thrombotic Stroke* OR Acute Thrombotic Stroke* OR Lacunar Stroke* OR Lacunar Syndrome* OR Lacunar Infarction* OR Lacunar Infarct*)) |
|                                                              | 2             | (TI=(Medication Adherence OR Medication Nonadherence OR Medication Noncompliance OR Medication Persistence OR Medication Compliance OR Medication Non-Compliance) OR AB=(Medication Adherence OR Medication Nonadherence OR Medication Noncompliance OR Medication Persistence OR Medication Compliance OR Medication Non-Compliance))                                                    |
|                                                              | 3             | (TI=(Barrier*))                                                                                                                                                                                                                                                                                                                                                                           |
|                                                              | 4             | 1 AND 2 AND 3                                                                                                                                                                                                                                                                                                                                                                             |
| <b>CINAHL Plus<br/>Full Text<br/>[November 21,<br/>2022]</b> | 1             | TX(Ischemic Stroke* OR Ischaemic Stroke* OR CryptogenicIschemic Stroke* OR Cryptogenic Stroke* OR Cryptogenic Embolism Stroke* OR Wake up Stroke* OR AcuteIschemic Stroke* OR Embolic Stroke* OR Cardioembolic Stroke* OR Cardio-embolic Stroke* OR Thrombotic Stroke* OR Acute Thrombotic Stroke* OR                                                                                     |

| Database<br>(Search time) | Search | Search String                                                                                                                                                                                                                                                                                                                      |
|---------------------------|--------|------------------------------------------------------------------------------------------------------------------------------------------------------------------------------------------------------------------------------------------------------------------------------------------------------------------------------------|
|                           |        | Lacunar Stroke* OR Lacunar Syndrome* OR Lacunar Infarction* OR Lacunar Infarct*)                                                                                                                                                                                                                                                   |
|                           | 2      | TX(Medication Adherence OR Medication Nonadherence OR Medication Noncompliance OR Medication Persistence OR Medication Compliance OR Medication Non-Compliance) OR AB(Medication Adherence OR Medication Nonadherence OR Medication Noncompliance OR Medication Persistence OR Medication Compliance OR Medication Non-Compliance) |
|                           | 3      | TX=(Barrier*)                                                                                                                                                                                                                                                                                                                      |
|                           | 4      | 1 AND 2 AND 3                                                                                                                                                                                                                                                                                                                      |

**Supplementary Table 2.** Summary data

| Reference, country, year | Study design, Sample size of target population (n), age (year)                                                                                                                                        | Study aim, medication adherence (MA) measurement                                                                                                                         | Key findings                                                                                                                                                                                                                                                                                                                                                                                                                                                                                                                                                                                                                                                                                                                                                                                                                                                                                                                                                         | Themes (Barriers to MA) based on Social Determinants of Health Domains                                                                                                                                                                                 | Summarize/Further research implication                                                                                                                                                                                                                                                                                       |
|--------------------------|-------------------------------------------------------------------------------------------------------------------------------------------------------------------------------------------------------|--------------------------------------------------------------------------------------------------------------------------------------------------------------------------|----------------------------------------------------------------------------------------------------------------------------------------------------------------------------------------------------------------------------------------------------------------------------------------------------------------------------------------------------------------------------------------------------------------------------------------------------------------------------------------------------------------------------------------------------------------------------------------------------------------------------------------------------------------------------------------------------------------------------------------------------------------------------------------------------------------------------------------------------------------------------------------------------------------------------------------------------------------------|--------------------------------------------------------------------------------------------------------------------------------------------------------------------------------------------------------------------------------------------------------|------------------------------------------------------------------------------------------------------------------------------------------------------------------------------------------------------------------------------------------------------------------------------------------------------------------------------|
| 40<br>French<br>2020     | Design:<br>Qualitative Study<br><br><ul style="list-style-type: none"> <li>• Ischemic Stroke (IS) (n=22)</li> <li>• Transient Ischemic Attack (TIA) (n=14)</li> </ul><br>Age (Mean, SD):<br>70.2±16.3 | <ul style="list-style-type: none"> <li>• To explore barriers and facilitators to adherence to medication after IS or TIA</li> <li>• Semi-Structured Interview</li> </ul> | <p><b><u>Barriers to MA</u></b></p> <ul style="list-style-type: none"> <li>• Lack of information due to three barriers preventing effective patient education, including lack of consultation time, use of technical jargon, and individual’s cognitive impairment.</li> <li>• Lack of understanding of the disease<br/><i>“No. I didn’t ask him, but he didn’t tell me. Oh doctors . . . they’re not like those we had in the past who explained everything to us, what we had, explained the medicine to us, what it would do. [. . .] they don’t have the time anymore”</i></li> <li>• Difficulties related to the Practical Management of Medications<br/><i>“It is true that when you’ve, for example, guests at home, you think more about taking care of the guests, you do not necessarily care about the pills.”</i></li> <li>• Side Effects<br/><i>“Anything to do with aspirin, for me that is a problem, because I’ve a hiatal hernia and</i></li> </ul> | <ul style="list-style-type: none"> <li>• Lack of health information</li> <li>• Health literacy and health perception</li> <li>• Medication side effects</li> <li>• Medication belief</li> <li>• Medication management due to social context</li> </ul> | Providing more tailored information at opportune moments, in particular by promoting discussions with primary care physicians throughout the course of illness and recovery, is essential to ensure that patients are not left alone in the decision-making process regarding adherence to secondary prevention medications. |

| Reference, country, year | Study design, Sample size of target population (n), age (year)                                                                         | Study aim, medication adherence (MA) measurement                                                                                                                                                                                                            | Key findings                                                                                                                                                                                                                                                                                                                                                                                                                                                                                                                                                                      | Themes (Barriers to MA) based on Social Determinants of Health Domains                                 | Summarize/Further research implication                                                                                                                                                                                                                                                                                                                                                                |
|--------------------------|----------------------------------------------------------------------------------------------------------------------------------------|-------------------------------------------------------------------------------------------------------------------------------------------------------------------------------------------------------------------------------------------------------------|-----------------------------------------------------------------------------------------------------------------------------------------------------------------------------------------------------------------------------------------------------------------------------------------------------------------------------------------------------------------------------------------------------------------------------------------------------------------------------------------------------------------------------------------------------------------------------------|--------------------------------------------------------------------------------------------------------|-------------------------------------------------------------------------------------------------------------------------------------------------------------------------------------------------------------------------------------------------------------------------------------------------------------------------------------------------------------------------------------------------------|
|                          |                                                                                                                                        |                                                                                                                                                                                                                                                             | <p><i>[. . .] I get terrible heart burn. And aspirin is a factor that . . . that does that. That's why I did not . . . I did not continue very long, because it was uncomfortable."</i></p> <ul style="list-style-type: none"> <li>The Healing Function of Treatments</li> </ul> <p><i>"For me it was . . . it was an indicator. The less I took the healthier I was, like."</i></p> <p><i>"And, the doctor, he already stopped, last year . . . I think two [pills]. I was relieved. To tell me that there were two less. I see it as something of an . . . improvement"</i></p> |                                                                                                        |                                                                                                                                                                                                                                                                                                                                                                                                       |
| 34<br>Lebanon<br>2021    | <p>Design: A cross-sectional study</p> <ul style="list-style-type: none"> <li>IS (n=100)</li> </ul> <p>Age (Mean, SD): 74.04±10.03</p> | <ul style="list-style-type: none"> <li>To assess medication adherence for secondary stroke prevention among Lebanese stroke survivors and identify the barriers behind non-compliance</li> <li>The Lebanese Medication Adherence Scale (LMAS-14)</li> </ul> | <p><b><u>Barriers to MA</u></b></p> <ul style="list-style-type: none"> <li>Patients with concerns about medications' side effects</li> <li>Patients with concerns about medications cost</li> </ul>                                                                                                                                                                                                                                                                                                                                                                               | <ul style="list-style-type: none"> <li>Financial restraint</li> <li>Medication side effects</li> </ul> | <p>The lack of social security insurance was a significant barrier to medication adherence in Lebanese stroke survivors and increased concerns about medication costs and side effects. Therefore, strategies to reduce patients' medication concerns and provide them with medical insurance can further improve medication adherence for secondary stroke prevention in the Lebanese community.</p> |

| Reference, country, year        | Study design, Sample size of target population (n), age (year)                                                | Study aim, medication adherence (MA) measurement                                                                                                                                                                                                                                                                                                                                                | Key findings                                                                                                                                                                                                                                                                                                                                                                        | Themes (Barriers to MA) based on Social Determinants of Health Domains                                             | Summarize/Further research implication                                                                                                                                                                                                                                         |
|---------------------------------|---------------------------------------------------------------------------------------------------------------|-------------------------------------------------------------------------------------------------------------------------------------------------------------------------------------------------------------------------------------------------------------------------------------------------------------------------------------------------------------------------------------------------|-------------------------------------------------------------------------------------------------------------------------------------------------------------------------------------------------------------------------------------------------------------------------------------------------------------------------------------------------------------------------------------|--------------------------------------------------------------------------------------------------------------------|--------------------------------------------------------------------------------------------------------------------------------------------------------------------------------------------------------------------------------------------------------------------------------|
| 41<br>Singapore<br>2022         | Design: A cross-sectional study<br><br>• IS (n=171)<br>• TIA (n=29)<br><br>Age (Mean, SD): 62.91±11.88        | <ul style="list-style-type: none"> <li>To investigate the relationship between medication adherence, trust in physicians, and beliefs about medication among stroke survivors. To determine whether beliefs about medications would mediate the relationship between trust in physicians and medication adherence.</li> <li>The shortened Medication Adherence Report Scale (MARS-5)</li> </ul> | <u>Barriers to MA</u> <ul style="list-style-type: none"> <li>Trust in physician</li> <li>Belief about medication</li> <li>Concern about medication</li> <li>Medication overuse (the belief that doctors overuse the medication)</li> </ul>                                                                                                                                          | <ul style="list-style-type: none"> <li>Medication belief</li> <li>Patient-Physician relationship</li> </ul>        | Future interventions to improve medication adherence may benefit from improving stroke survivors' trust in physicians and addressing their beliefs about medication.                                                                                                           |
| 36<br>Republic of Korea<br>2020 | Design: A cross-sectional study<br><br>• Acute Ischemic Stroke (AIS) (n=250)<br><br>Age (Mean, SD): 62.2±12.9 | <ul style="list-style-type: none"> <li>To investigate medication adherence among Korean stroke survivors within one year of their acute ischemic stroke and to identify the factors influencing their medication adherence</li> </ul>                                                                                                                                                           | <u>Optimal MA</u> <ul style="list-style-type: none"> <li>Being a non-smoker (OR = 3.19; 95% CI, 1.29–7.87; p = 0.012)</li> <li>More prescribed medicines (OR = 1.27; 95% CI, 1.05–1.54; p = 0.014)</li> <li>Less frequency of daily doses (OR = 0.37; 95% CI, 0.18–0.79; p = 0.010)</li> <li>Stronger beliefs about medication (OR = 1.09; 95% CI, 1.03–1.15; p = 0.004)</li> </ul> | <ul style="list-style-type: none"> <li>Health behavior</li> <li>Medication belief</li> <li>Polypharmacy</li> </ul> | Post-stroke care should concentrate on supporting patients' belief in the necessity of medication and encouraging lifestyle modifications, such as stopping smoking and prescribing medicine with simple regimens to improve the medication adherence of patients with stroke. |

| Reference, country, year | Study design, Sample size of target population (n), age (year)                                                                                                                                      | Study aim, medication adherence (MA) measurement                                                                                                                                                                                                                                                                         | Key findings                                                                                                                                                                                                                                                                                                                                                   | Themes (Barriers to MA) based on Social Determinants of Health Domains                                                                                                                                                                       | Summarize/Further research implication                                                                                                                                                                                                                                                                                                                                  |
|--------------------------|-----------------------------------------------------------------------------------------------------------------------------------------------------------------------------------------------------|--------------------------------------------------------------------------------------------------------------------------------------------------------------------------------------------------------------------------------------------------------------------------------------------------------------------------|----------------------------------------------------------------------------------------------------------------------------------------------------------------------------------------------------------------------------------------------------------------------------------------------------------------------------------------------------------------|----------------------------------------------------------------------------------------------------------------------------------------------------------------------------------------------------------------------------------------------|-------------------------------------------------------------------------------------------------------------------------------------------------------------------------------------------------------------------------------------------------------------------------------------------------------------------------------------------------------------------------|
|                          |                                                                                                                                                                                                     | <ul style="list-style-type: none"> <li>The 8-item Morisky Medication Adherence Scale (MMAS-8)</li> </ul>                                                                                                                                                                                                                 |                                                                                                                                                                                                                                                                                                                                                                |                                                                                                                                                                                                                                              |                                                                                                                                                                                                                                                                                                                                                                         |
| 35<br>India<br>2021      | <p>Design: A cross-sectional study</p> <ul style="list-style-type: none"> <li>IS (n=201)</li> <li>TIA (n=9)</li> <li>Hemorrhagic stroke (HS) (n=30)</li> </ul> <p>Age (Mean, SD): 58.64 ± 10.96</p> | <ul style="list-style-type: none"> <li>To determine factors associated with medication adherence among stroke survivors</li> <li>Self-reported medication adherence was defined as the consumption of at least &gt; 80% of their medications for the last two weeks, based on the patient's last prescription</li> </ul> | <p><b>Barriers to MA</b></p> <ul style="list-style-type: none"> <li>Memory issues (OR = 0.34; 95% CI, 0.16–0.71)</li> <li>Side effects (OR = 0.24; 95% CI, 0.11–0.42)</li> <li>Financial constraints (OR = 0.46; 95% CI, 0.24–0.91)</li> </ul>                                                                                                                 | <ul style="list-style-type: none"> <li>Financial restraint</li> <li>Medication side effects</li> <li>Cognitive impairment</li> </ul>                                                                                                         | To improve medication adherence establishing daily routines, frequent reminders, financial aid to purchase medicines, and patient education are recommended to improve medication adherence to prevent future strokes.                                                                                                                                                  |
| 38<br>India<br>2022      | <p>Design: A prospective study (A cross-sectional)</p> <p>IS (n=132)</p> <p>Age (Mean): 55 years</p>                                                                                                | <ul style="list-style-type: none"> <li>To determine the barriers to medication adherence for secondary prevention in patients with IS</li> <li>A medication adherence assessment questionnaire was</li> </ul>                                                                                                            | <p><b>Barriers to MA</b></p> <ul style="list-style-type: none"> <li>Worry about taking medication for a long time</li> <li>Stopping medications when feeling better</li> <li>Stopping medications intentionally</li> <li>Whitecoat adherence</li> <li>Forgetfulness</li> <li>Frequency (taking medication)</li> <li>Confusion in taking medications</li> </ul> | <ul style="list-style-type: none"> <li>Health literacy and health perception</li> <li>Medication belief</li> <li>Patient-Physician relationship</li> <li>Polypharmacy</li> <li>Access to healthcare</li> <li>Cognitive impairment</li> </ul> | It is essential to identify the barriers to medication adherence and determine them at the earliest to avoid recurrent strokes. Among the significant barriers, one of the most important factors was worrying about taking medications for a long time. Therefore, healthcare professionals, caregivers, and patients should work together to help patients understand |

| Reference, country, year | Study design, Sample size of target population (n), age (year)               | Study aim, medication adherence (MA) measurement                                                                                                                                                                                                                                              | Key findings                                                                                                                                                                                                                                                                                                                           | Themes (Barriers to MA) based on Social Determinants of Health Domains                                                 | Summarize/Further research implication                                                                                                                                                                                                                                                                                                                                       |
|--------------------------|------------------------------------------------------------------------------|-----------------------------------------------------------------------------------------------------------------------------------------------------------------------------------------------------------------------------------------------------------------------------------------------|----------------------------------------------------------------------------------------------------------------------------------------------------------------------------------------------------------------------------------------------------------------------------------------------------------------------------------------|------------------------------------------------------------------------------------------------------------------------|------------------------------------------------------------------------------------------------------------------------------------------------------------------------------------------------------------------------------------------------------------------------------------------------------------------------------------------------------------------------------|
|                          |                                                                              | developed based on the common problems faced by patients in the local setting                                                                                                                                                                                                                 | <ul style="list-style-type: none"> <li>• Number of medications</li> <li>• Difficulty in accessing the hospital</li> <li>• Difficulty in understanding the doctor</li> </ul>                                                                                                                                                            |                                                                                                                        | their medication more to enhance medication adherence.                                                                                                                                                                                                                                                                                                                       |
| 39<br>China<br>2020      | Design: A cross-sectional study<br>IS (n=306)<br>Age (Mean, SD): 63.47±10.20 | <ul style="list-style-type: none"> <li>• To examine the association and the mediating effect among medication beliefs, perception of illness, and medication adherence in IS patients</li> <li>• The shortened Medication Adherence Report Scale (MARS-5)</li> </ul>                          | <u><b>Barriers to MA</b></u> <ul style="list-style-type: none"> <li>• Specific concern (a higher score indicates a more significant worry about ischemic stroke medications)</li> <li>• Perception of illness (a higher overall perception of illness score indicates that the patient views the illness as more dangerous)</li> </ul> | <ul style="list-style-type: none"> <li>• Health Literacy and health perception</li> <li>• Medication belief</li> </ul> | Beliefs about IS medication and perceptions of IS components should be considered in the intervention to enhance adherence.                                                                                                                                                                                                                                                  |
| 42<br>Greece<br>2019     | Design: A cross-sectional study<br>IS (n=140)<br>Age (Mean, SD): 64.2±9      | <ul style="list-style-type: none"> <li>• To measure the level of compliance with the treatment and to identify socio-demographic, clinical, and subjective factors related to the long-term compliance of stroke patients with their treatment</li> <li>• The shortened Medication</li> </ul> | <u><b>Optimal MA</b></u> <ul style="list-style-type: none"> <li>• The perception of medication necessity (OR = 1.26; 95% CI, 1.01–1.56)</li> <li>• The doctor-patient communication (OR = 1.76; 95% CI, 1.15–2.70)</li> <li>• Patient's mental state (OR = 3.94; 95% CI, 1.84–4.46)</li> </ul>                                         | <ul style="list-style-type: none"> <li>• Medication belief</li> <li>• Patient-Physician relationship</li> </ul>        | Effective management of medication necessity perception and improving doctor-patient communication are crucial factors that influence compliance in the treatment of stroke patients. Taking these factors into consideration is essential for rehabilitation and return-to-work programs that aim to provide comprehensive support to individuals recovering from a stroke. |

| Reference,<br>country,<br>year | Study design,<br>Sample size of<br>target<br>population (n),<br>age (year) | Study aim,<br>medication<br>adherence (MA)<br>measurement | Key findings | Themes (Barriers to<br>MA) based on Social<br>Determinants of Health<br>Domains | Summarize/Further<br>research implication |
|--------------------------------|----------------------------------------------------------------------------|-----------------------------------------------------------|--------------|---------------------------------------------------------------------------------|-------------------------------------------|
|                                |                                                                            | Adherence Report<br>Scale (MARS-5)                        |              |                                                                                 |                                           |

**Supplementary Table 3.** The methodological quality of the included studies

| Appraisal questions/Reference                                                                       | 40 | 34 | 41 | 36 | 35 | 38 | 39 | 42 |
|-----------------------------------------------------------------------------------------------------|----|----|----|----|----|----|----|----|
| <b>JBI CRITICAL APPRAISAL CHECKLIST FOR ANALYTICAL CROSS-SECTIONAL STUDIES</b>                      |    |    |    |    |    |    |    |    |
| 1. Were the criteria for inclusion in the sample clearly defined?                                   |    | +  | +  | +  | +  | +  | +  | +  |
| 2. Were the study subjects and the setting described in detail?                                     |    | +  | +  | +  | +  | +  | +  | +  |
| 3. Was the exposure measured in a valid and reliable way?                                           |    | +  | ?  | ?  | +  | \  | +  | +  |
| 4. Were objective, standard criteria used for the measurement of the condition?                     |    | +  | +  | +  | +  | +  | +  | +  |
| 5. Were confounding factors identified?                                                             |    | +  | +  | +  | -  | +  | +  | +  |
| 6. Were strategies to deal with confounding factors stated?                                         |    | +  | +  | +  | -  | -  | +  | +  |
| 7. Were the outcomes measured in a valid and reliable way?                                          |    | +  | ?  | +  | -  | +  | +  | +  |
| 8. Was appropriate statistical analysis used?                                                       |    | +  | +  | +  | +  | +  | +  | +  |
| <b>JBI CRITICAL APPRAISAL CHECKLIST FOR QUALITATIVE RESEARCH</b>                                    |    |    |    |    |    |    |    |    |
| 1. Is there congruity between the stated philosophical perspective and the research methodology?    | ?  |    |    |    |    |    |    |    |
| 2. Is there congruity between the research methodology and the research question or objectives?     | +  |    |    |    |    |    |    |    |
| 3. Is there congruity between the research methodology and the methods used to collect data?        | +  |    |    |    |    |    |    |    |
| 4. Is there congruity between the research methodology and the representation and analysis of data? | +  |    |    |    |    |    |    |    |
| 5. Is there congruity between the research methodology and the interpretation of results?           | +  |    |    |    |    |    |    |    |
| 6. Is there a statement locating the researcher culturally or theoretically?                        | ?  |    |    |    |    |    |    |    |
| 7. Is the influence of the researcher on the research, and vice-versa, addressed?                   | ?  |    |    |    |    |    |    |    |
| 8. Are participants, and their voices, adequately represented?                                      | +  |    |    |    |    |    |    |    |

| <b>Appraisal questions/Reference</b>                                                                                                               | 40   | 34    | 41   | 36     | 35     | 38   | 39    | 42    |
|----------------------------------------------------------------------------------------------------------------------------------------------------|------|-------|------|--------|--------|------|-------|-------|
| 9. Is the research ethical according to current criteria or, for recent studies, and is there evidence of ethical approval by an appropriate body? | +    |       |      |        |        |      |       |       |
| 10. Do the conclusions drawn in the research report flow from the analysis or interpretation of the data?                                          | +    |       |      |        |        |      |       |       |
| <b>Percentage of yes* (%)</b>                                                                                                                      | 70 % | 100 % | 75 % | 87.5 % | 62.5 % | 75 % | 100 % | 100 % |

"+": yes; "-": no; "?": unclear; "\": not applicable

\*The number of "yes" / total items in the checklist ×100

## Reference

40. Viprey M, Gouillet M, Puppo C, et al. A Qualitative Study of Barriers and Facilitators to Adherence to Secondary Prevention Medications Among French Patients Suffering from Stroke and Transient Ischemic Attack. *PATIENT PREFERENCE AND ADHERENCE*. 2020;14:1213-1223. doi:10.2147/PPA.S257323
34. Saade S, Kobeissy R, Sandakli S, et al. Medication adherence for secondary stroke prevention and its barriers among lebanese survivors: A cross-sectional study. *CLINICAL EPIDEMIOLOGY AND GLOBAL HEALTH*. JAN-MAR 2021;9:338-346. doi:10.1016/j.cegh.2020.10.007
41. Fan QQ, Doshi K, Narasimhalu K, et al. Impact of beliefs about medication on the relationship between trust in physician with medication adherence after stroke. *PATIENT EDUCATION AND COUNSELING*. APR 2022;105(4):1025-1029. doi:10.1016/j.pec.2021.07.016
36. Kim G-G, Chae D-H, Park M-S, Yoo S-H. Factors influencing 1-year medication adherence of Korean ischemic stroke survivors. *International Journal of Behavioral Medicine*. 2020;27(2):225-234.
35. Shani SD, Sylaja PN, Sarma PS, Kutty VR. Facilitators and barriers to medication adherence among stroke survivors in India. *JOURNAL OF CLINICAL NEUROSCIENCE*. JUN 2021;88:185-190. doi:10.1016/j.jocn.2021.03.019
38. Velusamy S, Varatharaj K, Kathirvel R, Venkatesan P, Varghese LJ. Determination of Barriers in Medication Adherence for Secondary Prevention in Stroke Patients. *Indian Journal of Pharmacy Practice*. 2022;15(2)

39. Ruksakulpiwat S, Liu Z, Yue S, Fan Y. The association among medication beliefs, perception of illness and medication adherence in ischemic stroke patients: a cross-sectional study in China. *Patient preference and adherence*. 2020;14:235.
42. Cheiloudaki E, Alexopoulos EC. Adherence to Treatment in Stroke Patients. *International Journal of Environmental Research and Public Health*. 2019;16(2):196.
